# Supplementary material for: ABF2 and MYB transcription factors regulate feruloyl transferase FHT involved in ABA-mediated wound suberization of kiwifruit
Source: PubMed Central journal article supplement — J Exp Bot. 2019 Sep 27;71(1):305–17. doi: 10.1093/jxb/erz430 (PMC6913711; doi:10.1093/jxb/erz430), 2019-09-27

**Supplementary Fig. S1. SDS-PAGE gel stained with Coomassie brilliant blue for purified AchnFHT protein.**

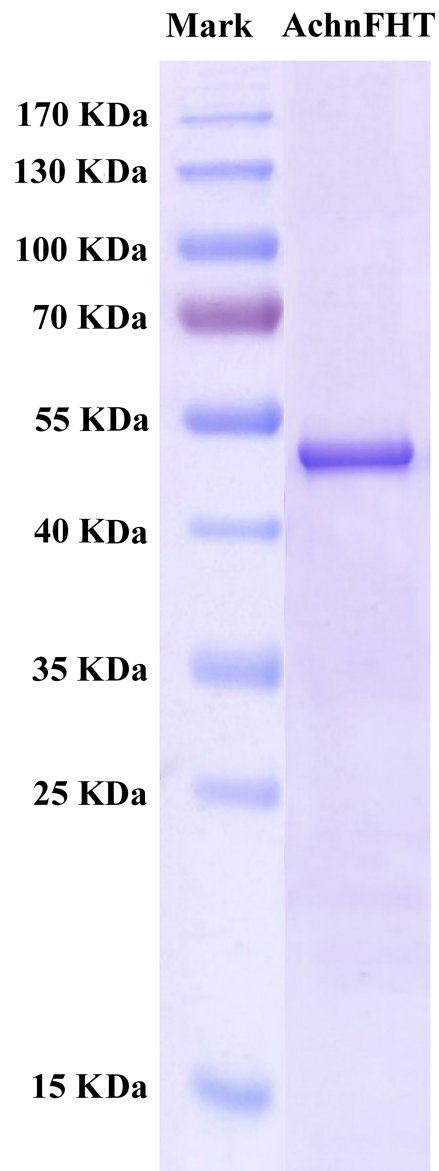

Supplement: erz430_suppl_supplementary_figure_s1.pdf [file erz430_suppl_supplementary_figure_s1.pdf]
