# Supplementary material for: ABF2 and MYB transcription factors regulate feruloyl transferase FHT involved in ABA-mediated wound suberization of kiwifruit
Source: PubMed Central journal article supplement — J Exp Bot. 2019 Sep 27;71(1):305–17. doi: 10.1093/jxb/erz430 (PMC6913711; doi:10.1093/jxb/erz430), 2019-09-27
Supplement: erz430_suppl_supplementary_tables_s1-s2.pdf [file erz430_suppl_supplementary_tables_s1-s2.pdf]

**Supplementary Table S1. Primer sequences were used for quantitative real-time PCR.**

| Gene name                 | Accession number                     | Primer sequence (5'-3') forward/reverse | Amplicon size | Reference                |
|---------------------------|--------------------------------------|-----------------------------------------|---------------|--------------------------|
| Actin (Internal standard) | Achn107181 (At2g37620)               | GTGCTCAGTGGTGGTTCAA                     | 126           | Han <i>et al.</i> , 2018 |
|                           |                                      | GACGCTGTATTCCTCTCAG                     |               |                          |
| AchnFHT                   | Achn348111 (At5g41040)               | AAGCTGATCGTGGATTGTACCGG                 | 276           |                          |
|                           |                                      | TTCTCCCCATGAGTTGACAAATTC                |               |                          |
| AchnABF2                  | Achn315671 (AT1G45249)               | AGAACTATGGAAGCGAGCCG                    | 261           |                          |
|                           |                                      | CCTGCCTCTGCAAATACCCA                    |               |                          |
| AchnMYB41                 | Achn345001 (At4g28110)               | GTAGAGACTGGTGGTGTGGATGCGT               | 279           |                          |
|                           |                                      | ACTCTTCCGCACCTCTGTAACCCG                |               |                          |
| AchnMYB107                | Achn267491 (At3g02940)               | CTTTGAGGTTTCACACTGATGCTAC               | 191           |                          |
|                           |                                      | ATCTTCTAAATGACTACTCCCTCTG               |               |                          |
| AchnMYB4                  | Achn020361 (At4g38620)               | CGCCACCATATCTTTTTCAACCCCT               | 235           |                          |
|                           |                                      | ACCATTATCACTACAACCACACCCCT              |               |                          |
| PP2A (Internal standard)  | Niben101Scf09716g01002.1 (At1g13320) | GACCCTGATGTTGATGTTTCGCT                 | 123           | Liu <i>et al.</i> , 2012 |
|                           |                                      | GAGGGATTGAAGAGAGATTTC                   |               |                          |
| NbFHT                     | Niben101Scf08936g06001.1 (At5g41040) | GACATTCCCTGGTCTAAAAACATAC               | 173           |                          |
|                           |                                      | ATTGGTACACCTCTGGCTGTTTAC                |               |                          |
| NbFHT2                    | Niben101Scf14958g00043.1 (At5g41040) | TCTCCAGAAGAGGAAACAAACAAGG               | 119           |                          |
|                           |                                      | GCATTCTCATTTCTTTTTCTCAG                 |               |                          |
| NbKCS2                    | Niben101Scf06901g01012.1 (At1g04220) | ATTTAGCGTTTCAAAAGAAGATACT               | 189           |                          |
|                           |                                      | TCCCAATATCCTTAGCCTTACACC                |               |                          |
| NbKCS4                    | Niben101Scf05279g05007.1 (At1g04220) | GTGTTCAATCCCACTCCTCACTTT                | 191           |                          |
|                           |                                      | TGTGTTATGTTCTCCGTGCTGACCA               |               |                          |
| NbKCS11                   | Niben101Scf08523g00022.1 (At1g04220) | TTTCCTAACCCGTCCTCGCCCTGTA               | 197           |                          |
|                           |                                      | CGGCTTCGGGAGATAGGTTGATTC                |               |                          |
| NbCYP86A1                 | Niben101Scf02250g03013.1 (At5g58860) | AAACTCTTCTCCTAAAATGCCTGA                | 159           |                          |
|                           |                                      | CTTGGAGGCTTTTTTGTAACTTTT                |               |                          |
| NbCYP86B1                 | Niben101Scf07191g02026.1 (At5g23190) | TCTTCGGTTTGTGACTCCAACGCTT               | 217           |                          |
|                           |                                      | CCTTCCTCGTTCATCTTCTAGCCCC               |               |                          |
| NbFAR2                    | Niben101Scf05711g00021.1 (At5g22500) | TTATGTAAATGGACAGCGACAAGGT               | 113           |                          |
|                           |                                      | AAAAGGGGAAGGAGTTGTGATTGAC               |               |                          |
| NbFAR3                    | Niben101Scf03113g01012.1 (At5g22500) | AGGAAATGTGGAAGGAAGTAGATGT               | 191           |                          |
|                           |                                      | ACCTGCCTTCTCCCCAGATACAAAT               |               |                          |
| Nb4CL1                    | Niben101Scf07623g01036.1 (At3G21230) | TGTGGGCAAAGTGAAGGATTACGCT               | 203           |                          |
|                           |                                      | TCAACATCACACCTTTCGGCAGACC               |               |                          |
| NbPAL2                    | Niben101Scf05617g00005.1 (At2g37040) | CTGAAGTAATGAACGGAAAGCCTGA               | 207           |                          |
|                           |                                      | GCCATTGTGGAGATGTTCCGGAGAGC              |               |                          |

**References**

- Han XY, Lu WJ, Wei XP, Li L, Mao LC, Zhao YY. 2018. Proteomics analysis to understand the ABA stimulation of wound suberization in kiwifruit. *Journal of Proteomics* **173**, 42–51.
- Liu DS, Shi LD, Han CG, Yu JL, Li DW, Zhang YL. 2012. Validation of reference genes for gene expression studies in virus-infected *Nicotiana benthamiana* using quantitative real-time PCR. *Plos One* **7**, e46451.

**Supplementary Table S2. Primer sequences were used for full-length amplification and vector construction.**

| Gene                   | Primer sequence (5'-3') forward/reverse    |
|------------------------|--------------------------------------------|
| AchnFHT                | ATGGAGAATGGTTATAACAACAAATTTGA              |
|                        | CTATATCTGCATAAGCCCTTCAAAC                  |
| AchnABF2               | ATGAACTTCAAGAACTATGG                       |
|                        | TTAAGCTCCTTGCTGCGTGT                       |
| AchnMYB4               | ATGGGAAGGTCTCCATGTTG                       |
|                        | TTATTTTCATCTCCAAGCTTC                      |
| AchnMYB41              | ATGGAAACGGATTCAATTGA                       |
|                        | TCAACATGTAGTTGCTGCAA                       |
| AchnMYB107             | ATGGACAGATCACCAATCAG                       |
|                        | TCACTCTATAATCTCTCTCC                       |
| pET28a-FHT             | GAGCTCATGGAGAATGGTTATAACAACAAATTTGA        |
|                        | GTCGACTATCTGCATAAGCCCTTCAAAC               |
| pBI121-AchnFHT         | GAGAACACGGGGACTCTAGAATGGAGAATGGTTATAACAA   |
|                        | AAAACGACGGCCAGTGAATTCCTATATCTGCATAAGCCCTT  |
| pBI121-AchnABF2        | GAGAACACGGGGACTCTAGAATGAACTTCAAGAACTATGG   |
|                        | AAAACGACGGCCAGTGAATTCCTAAGCTCCTTGCTGCGTGT  |
| pBI121-AchnMYB4        | GAGAACACGGGGACTCTAGAATGGGAAGGTCTCCATGTTG   |
|                        | AAAACGACGGCCAGTGAATTCCTATTTTCATCTCCAAGCTTC |
| pBI121-AchnMYB41       | GAGAACACGGGGACTCTAGAATGGAAACGGATTCAATTGA   |
|                        | AAAACGACGGCCAGTGAATTCCTCAACATGTAGTTGCTGCAA |
| pBI121-AchnMYB107      | GAGAACACGGGGACTCTAGAATGGACAGATCACCAATCAG   |
|                        | AAAACGACGGCCAGTGAATTCCTCACTCTATAATCTCTCTCC |
| AD-AchnABF2            | GTACCAGATTACGCTCATATGATGAACTTCAAGAACTATGG  |
|                        | ACGATTCATCTGCAGCTCGAGTTAAGCTCCTTGCTGCGTGT  |
| AD-AchnMYB4            | GTACCAGATTACGCTCATATGATGGGAAGGTCTCCATGTTG  |
|                        | ACGATTCATCTGCAGCTCGAGTTATTTTCATCTCCAAGCTTC |
| AD-AchnMYB41           | GTACCAGATTACGCTCATATGATGGAAACGGATTCAATTGA  |
|                        | ACGATTCATCTGCAGCTCGAGTCAACATGTAGTTGCTGCAA  |
| AD-AchnMYB107          | GTACCAGATTACGCTCATATGATGGACAGATCACCAATCAG  |
|                        | ACGATTCATCTGCAGCTCGAGTCACTCTATAATCTCTCTCC  |
| pAbAi-AchnFHT promoter | CTTGAATTCGAGCTCGGTACCGATTGTGTACCAAGGTATCA  |
|                        | ATACAGAGCACATGCCTCGAGTCATGTAGATGGCGGTAGGC  |
| SK-AchnABF2            | GCGGCCGCTCTAGAACTAGTGATGAACTTCAAGAACTATGG  |
|                        | GGTCGACGGTATCGATAAGCTTTAAGCTCCTTGCTGCGTGT  |
| SK-AchnMYB4            | GCGGCCGCTCTAGAACTAGTGATGGGAAGGTCTCCATGTTG  |
|                        | GGTCGACGGTATCGATAAGCTTTATTTTCATCTCCAAGCTTC |
| SK-AchnMYB41           | GCGGCCGCTCTAGAACTAGTGATGGAAACGGATTCAATTGA  |
|                        | GGTCGACGGTATCGATAAGCTTCAACATGTAGTTGCTGCAA  |
| SK-AchnMYB107          | GCGGCCGCTCTAGAACTAGTGATGGACAGATCACCAATCAG  |
|                        | GGTCGACGGTATCGATAAGCTTCACTCTATAATCTCTCTCC  |
| LUC-AchnFHT promoter   | GTCGACGGTATCGATAAGCTTGATTGTGTACCAAGGTAT    |
|                        | CGCTCTAGAACTAGTGGATCCTCATGTAGATGGCGGTAGGC  |
| GFP-AchnFHT            | ACGGGGACTCTAGAGGATCCATGGAGAATGGTTATAACAA   |
|                        | GCTCACCATAAGCTTGTCGACTATCTGCATAAGCCCTT     |

|                |                                           |
|----------------|-------------------------------------------|
| GFP-AchnABF2   | ACGGGGGACTCTAGAGGATCCATGAACTCAAGAACTATGG  |
|                | GCTCACCATAAGCTTGTCGACAGCTCCTTGCTGCGTGT    |
| GFP-AchnMYB4   | ACGGGGGACTCTAGAGGATCCATGGGAAGGTCTCCATGTTG |
|                | GCTCACCATAAGCTTGTCGACTTTCATCTCCAAGCTTC    |
| GFP-AchnMYB41  | ACGGGGGACTCTAGAGGATCCATGGAAACGGATTCAATTGA |
|                | GCTCACCATAAGCTTGTCGACACATGTAGTTGCTGCAA    |
| GFP-AchnMYB107 | ACGGGGGACTCTAGAGGATCCATGGACAGATCACCAATCAG |
|                | GCTCACCATAAGCTTGTCGACCTCTATAATCTCTCTCC    |
